# Supplementary material for: Memory Deficits Induced by Inflammation Are Regulated by α5-Subunit-Containing GABAA Receptors
Source: PubMed Central journal article supplement — Cell Rep. Author manuscript; Available in PMC 2015 Apr 9. (PMC4391624; doi:10.1016/j.celrep.2012.08.022), 2012-09-20
Supplement: NIHMS430016-supplement-supplementary.pdf [file NIHMS430016-supplement-supplementary.pdf]

Table S1. The Parameters of GABAergic mIPSCs Measured before and after Treatment of Neurons with IL-1 $\beta$  (20 ng ml<sup>-1</sup>) in the Absence or Presence of IL-1 Receptor Antagonist (IL-1ra, 250 ng ml<sup>-1</sup>) (Mean  $\pm$  SEM), Related To Figure 3

|                                | <b>Amplitude<br/>(pA)</b>  | <b>Frequency<br/>(Hz)</b> | <b>Rise time<br/>(ms)</b> | <b>Decay time<br/>(ms)</b> | <b>Area<br/>(pA.ms)</b>      |
|--------------------------------|----------------------------|---------------------------|---------------------------|----------------------------|------------------------------|
| <b>Control</b>                 | 30.0 $\pm$ 2.8<br>(n = 6)  | 4.5 $\pm$ 1.7<br>(n = 6)  | 2.9 $\pm$ 0.3<br>(n = 6)  | 16.3 $\pm$ 0.9<br>(n = 6)  | 352.6 $\pm$ 38.0<br>(n = 6)  |
| <b>IL-1<math>\beta</math></b>  | 24.7 $\pm$ 2.1*<br>(n = 6) | 3.7 $\pm$ 2.3<br>(n = 6)  | 2.4 $\pm$ 0.1<br>(n = 6)  | 14.8 $\pm$ 1.1<br>(n = 6)  | 279.0 $\pm$ 46.5*<br>(n = 6) |
| <b>IL-1ra</b>                  | 30.0 $\pm$ 2.3<br>(n = 6)  | 6.5 $\pm$ 4.4<br>(n = 6)  | 2.6 $\pm$ 0.2<br>(n = 6)  | 15.4 $\pm$ 0.8<br>(n = 6)  | 372.7 $\pm$ 45.6<br>(n = 6)  |
| <b>+IL-1<math>\beta</math></b> | (n = 6)                    | (n = 6)                   | (n = 6)                   | (n = 6)                    | (n = 6)                      |

Amplitude: one-way ANOVA,  $F_{(2,15)} = 5.08$ ,  $p = 0.03$ , Dunnett's post-hoc test, \*  $p < 0.05$ , compared with control. Area: one-way ANOVA,  $F_{(2,15)} = 4.27$ ,  $p = 0.04$ , Dunnett's post-hoc test, \*  $p < 0.05$ , compared with control.
